# Supplementary material for: Metabolome and gut microbiota variation with long-term intake of Panax ginseng extracts on rats
Source: Royal Society of Chemistry journal article supplement (doi:10.1039/c8fo00025e), 2018-01-01
Supplement: c8fo00025e1.pdf [file c8fo00025e1.pdf]

## Supplementary Information

# Metabolome and Gut Microbiota Variations of Long-term Intake of Panax Ginseng Extracts on Rats

Yifan Sun<sup>a†</sup>, Shaoqiu Chen<sup>b†</sup>, Runming Wei<sup>b†</sup>, Xie Xie<sup>a</sup>, Chongchong Wang<sup>a</sup>, Shihao Fan<sup>c</sup>, Xia Zhang<sup>a</sup>,  
Juan Su<sup>c</sup>, Jiajian Liu<sup>d</sup>, Wei Jia<sup>abd\*</sup> and Xiaoyan Wang<sup>a\*</sup>

†These authors contributed equally to this work.

\* To whom correspondence should be addressed;

Xiaoyan Wang at Ministry of Education Key Laboratory of Systems Biomedicine, Shanghai Center for Systems Biomedicine, Shanghai Jiao Tong University, Shanghai 200240, China. Phone: 86-21-34207343; Fax: 86-21-34206059; E-mail: cathywxy@sjtu.edu.cn

Wei Jia at Ministry of Education Key Laboratory of Systems Biomedicine, Shanghai Center for Systems Biomedicine, Shanghai Jiao Tong University, Shanghai 200240, China. Phone: 86-21-34207343; Fax: 86-21-34206059; E-mail: weijia@sjtu.edu.cn

## Table of contents

### Supplementary Figures

**Fig.S1** PLS-DA scores plot based on the cecum, ileum, serum metabolic profiling of administration of GS group compared with C group.

**Fig.S2** Person correlation analysis of cecum microbiota and metabolites

**Fig.S3** Person correlation analysis of ileum microbiota and metabolites

### Supplementary Tables

**Table S1.** Differential cecum metabolites to be accountable for the separation between administration of GS group and C group

**Table S2.** Differential ileum metabolites to be accountable for the separation between administration of GS group and C group

**Table S3.** Differential serum metabolites to be accountable for the separation between administration of GS group and C group

---

<sup>a</sup> Ministry of Education Key Laboratory of Systems Biomedicine, Shanghai Center for Systems Biomedicine, Shanghai Jiao Tong University, Shanghai, 200240, P. R. China

<sup>b</sup> University of Hawaii Cancer Center, Honolulu 96813, USA

<sup>c</sup> College of Veterinary Medicine, Nanjing Agriculture University, Nanjing, China

<sup>d</sup> Shanghai Key Laboratory of Diabetes Mellitus and Center for Translational Medicine, Shanghai Jiao Tong University Affiliated Sixth People's Hospital, Shanghai, China

## Supplementary Figures

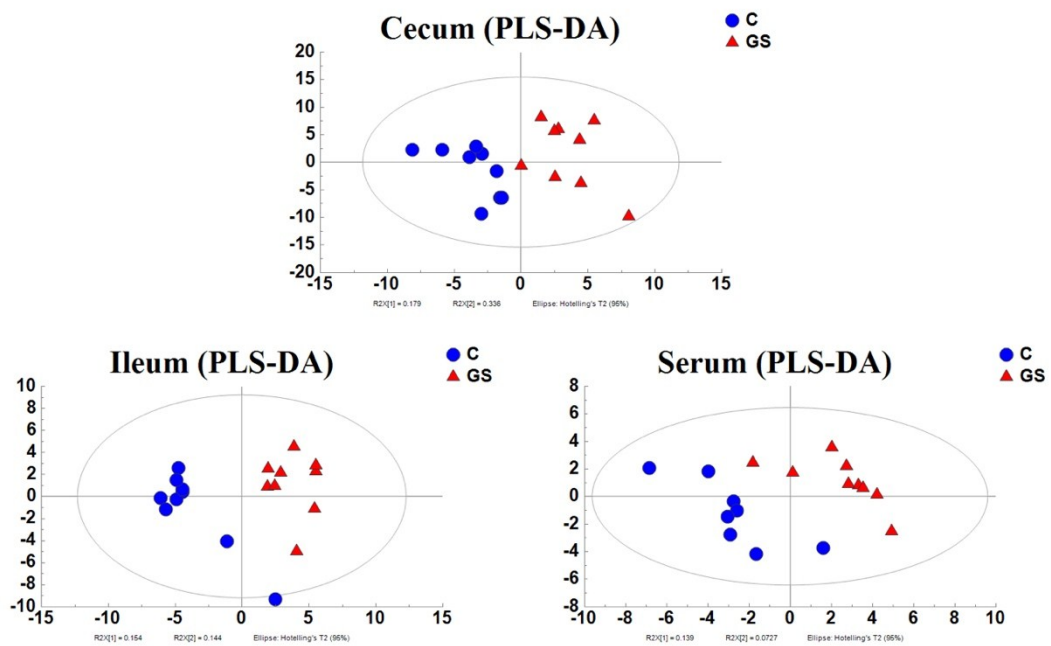

**Fig.S1** PLS-DA scores plot based on the cecum, ileum, serum metabolic profiling of administration of GS group compared with C group. cecum ( $R^2X = 0.642$ ,  $Q^2 = 0.663$ ), ileum ( $R^2X = 0.674$ ,  $R^2Y = 0.975$ ,  $Q^2 = 0.528$ ), serum ( $R^2X = 0.317$ ,  $R^2Y = 0.935$ ,  $Q^2 = -0.0224$ )

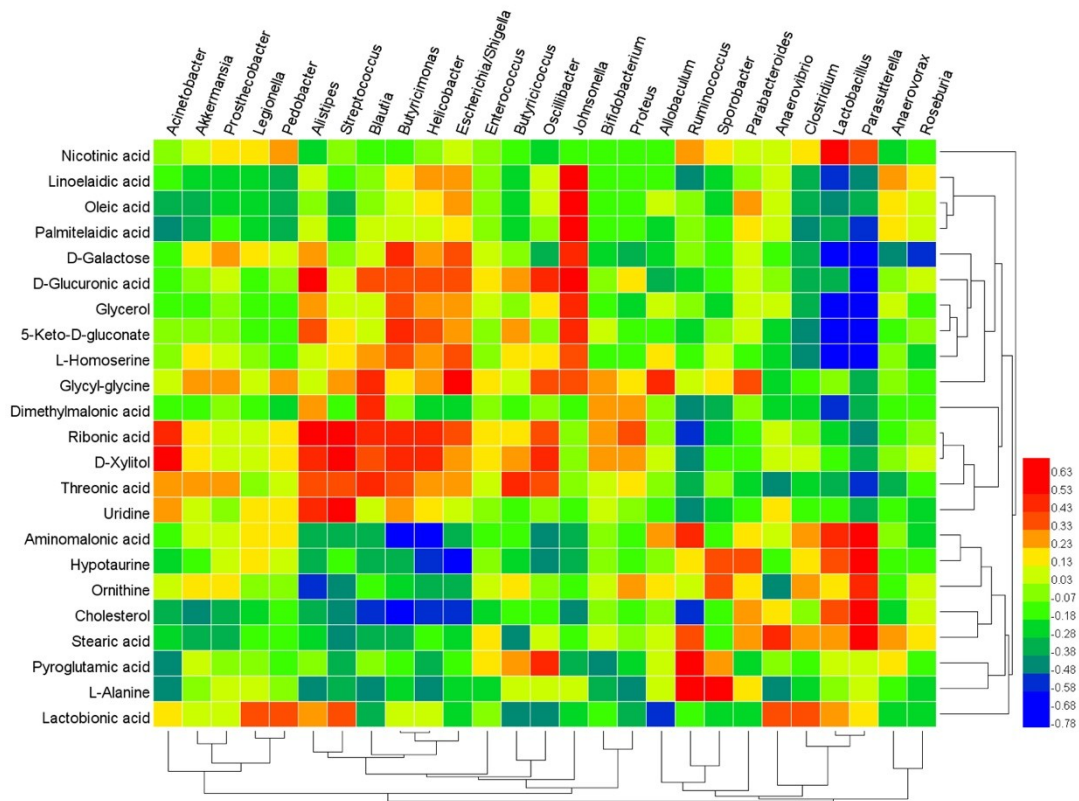

**Fig.S2** Spearman correlation coefficient analysis of ceceal microbiota and metabolites

**Note.** The Spearman correlation coefficient was calculated by R. The value  $> 0$  indicating positive correlations between gut microbiota and metabolites, while value  $< 0$  indicating negative correlations.

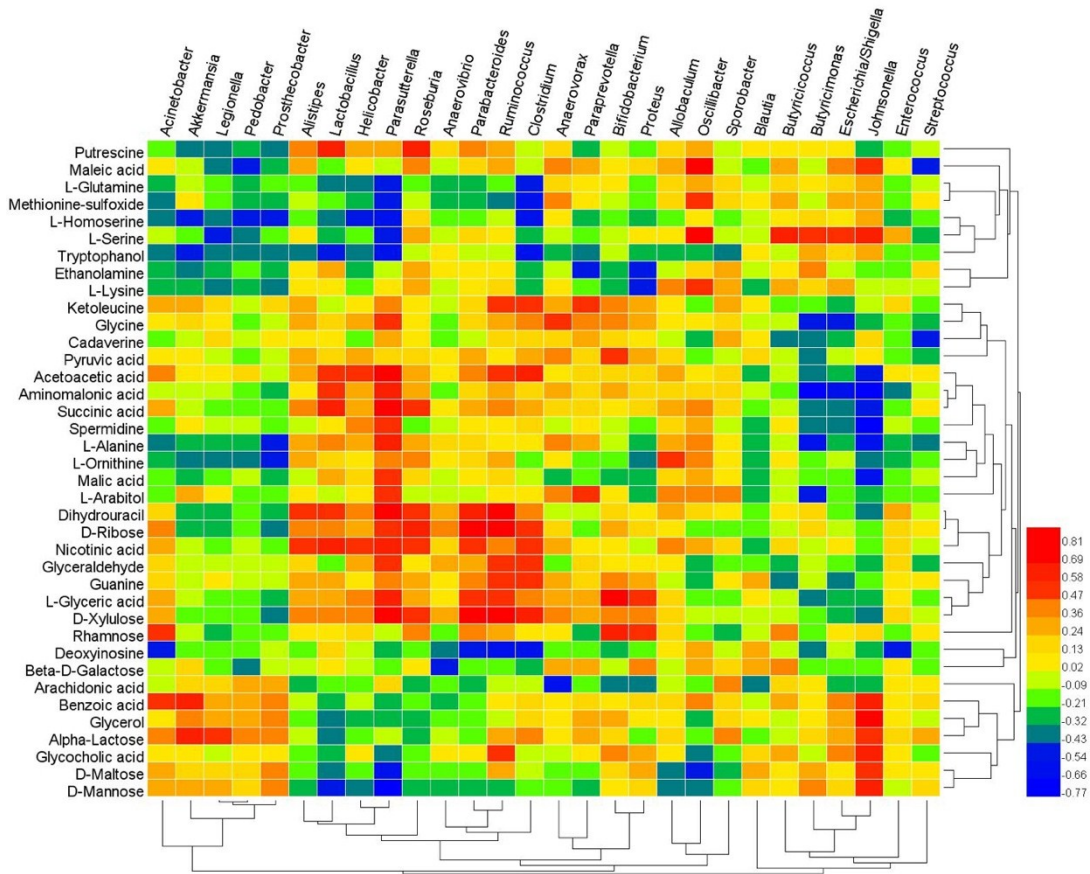

**Fig.S3** Spearman correlation coefficient analysis of ileum microbiota and metabolites

**Note.** The Spearman correlation coefficient was calculated by R. The value  $> 0$  indicating positive correlations between gut microbiota and metabolites, while value  $< 0$  indicating negative correlations.

## Supplementary Tables

**Table S1. Differential cecum metabolites to be accountable for the separation between administration of GS group and C group**

| No. | Metabolites          | FC <sup>a</sup> | P<br>(t test) | VIP <sup>b</sup> |
|-----|----------------------|-----------------|---------------|------------------|
| 1   | Glycerol             | 0.51            | 0.003         | 2.02             |
| 2   | L-Alanine            | 1.61            | 0.005         | 1.98             |
| 3   | Hypotaurine          | 9.58            | 0.012         | 1.84             |
| 4   | L-Homoserine         | 0.63            | 0.006         | 2.06             |
| 5   | Pyroglutamic acid    | 1.76            | 0.048         | 1.17             |
| 6   | L-Ornithine          | 1.36            | 0.027         | 1.50             |
| 7   | D-Galactose          | 0.23            | 0.002         | 2.05             |
| 8   | D-Glucuronic acid    | 0.58            | 0.003         | 2.01             |
| 9   | 5-Keto-D-gluconate   | 0.34            | 0.003         | 1.84             |
| 10  | Linoelaidic acid     | 0.55            | 0.002         | 1.87             |
| 11  | Stearic acid         | 1.47            | 0.022         | 1.56             |
| 12  | Oleic acid           | 0.58            | 0.007         | 1.61             |
| 13  | Palmitelaidic acid   | 0.53            | 0.003         | 1.67             |
| 14  | Aminomalonic acid    | 1.77            | 0.001         | 2.35             |
| 15  | Nicotinic acid       | 1.24            | 0.034         | 1.19             |
| 16  | Lactobionic acid     | 6.93            | 0.030         | 1.43             |
| 17  | Dimethylmalonic acid | 0.77            | 0.013         | 1.06             |
| 18  | Ribonic acid         | 0.56            | 0.005         | 1.86             |
| 19  | Threonic acid        | 0.69            | 0.014         | 1.95             |
| 20  | Uridine              | 0.54            | 0.025         | 1.59             |
| 21  | D-Xylitol            | 0.56            | 0.018         | 1.65             |
| 22  | Glycyl-glycine       | 0.54            | 0.033         | 1.35             |
| 22  | Cholesterol          | 2.24            | 0.015         | 1.79             |

<sup>a</sup>Fold change was obtained by calculating the relative concentration between administration of GS group compared with Control Group. <sup>b</sup>Variable importance in the projection (VIP) was obtained from PLS-DA with a threshold of 1.0.

**Table S2. Differential ileum metabolites to be accountable for the separation between administration of GS group and C group**

| No. | Metabolites             | FC <sup>a</sup> | P<br>(t test) | VIP <sup>b</sup> |
|-----|-------------------------|-----------------|---------------|------------------|
| 1   | Glycerol                | 0.62            | 0.030         | 1.57             |
| 2   | L-Arabitol              | 1.86            | 0.009         | 1.30             |
| 3   | Ethanolamine            | 2.07            | 0.083         | 1.16             |
| 4   | Putrescine              | 1.45            | 0.075         | 1.28             |
| 5   | Cadaverine              | 4.82            | 0.078         | 1.14             |
| 6   | Spermidine              | 3.85            | 0.010         | 1.61             |
| 7   | L-Alanine               | 3.08            | 0.002         | 2.07             |
| 8   | Glutamine               | 0.63            | 0.077         | 1.28             |
| 9   | L-Glycine               | 2.92            | 0.018         | 1.53             |
| 10  | Homoserine              | 0.56            | 0.031         | 1.48             |
| 11  | L-Lysine                | 1.32            | 0.102         | 1.09             |
| 12  | L-Ornithine             | 2.55            | 0.032         | 1.62             |
| 13  | Glyceraldehyde          | 3.89            | 0.066         | 1.20             |
| 14  | D-Maltose               | 0.22            | 0.004         | 2.03             |
| 15  | Beta-D-Galactose        | 0.38            | 0.076         | 1.14             |
| 16  | D-Ribose                | 1.46            | 0.118         | 1.05             |
| 17  | Rhamnose                | 1.74            | 0.067         | 1.06             |
| 18  | Alpha-Lactose           | 0.73            | 0.058         | 1.00             |
| 19  | D-Xylulose              | 3.06            | 0.043         | 1.38             |
| 20  | Arachidonic acid        | 2.87            | 0.023         | 1.45             |
| 21  | Ketoleucine             | 2.72            | 0.099         | 1.07             |
| 22  | Acetoacetic acid        | 2.51            | 0.002         | 2.10             |
| 23  | Aminomalonic acid       | 4.60            | 0.004         | 1.97             |
| 24  | Succinic acid           | 2.06            | 0.011         | 1.67             |
| 25  | Glycocholic acid        | 0.62            | 0.008         | 1.67             |
| 26  | L-Glyceric acid         | 2.99            | 0.018         | 1.53             |
| 27  | Malic acid              | 2.42            | 0.022         | 1.61             |
| 28  | Nicotinic acid          | 1.40            | 0.052         | 1.30             |
| 29  | Pyruvic acid            | 2.55            | 0.078         | 1.10             |
| 30  | Deoxyinosine            | 5.56            | 0.056         | 1.26             |
| 31  | Dihydrouracil           | 1.94            | 0.033         | 1.57             |
| 32  | Guanine                 | 1.75            | 0.104         | 1.06             |
| 33  | Methionine<br>sulfoxide | 0.52            | 0.058         | 1.22             |

<sup>a</sup>Fold change was obtained by calculating the relative concentration between administration of GS group compared with Control Group. <sup>b</sup>Variable importance in the projection (VIP) was obtained from PLS-DA with a threshold of 1.0.

**Table S3. Differential serum metabolites to be accountable for the separation between administration of GS group and C group**

| No. | Metabolites                     | FC <sup>a</sup> | P<br>(t test) | VIP <sup>b</sup> |
|-----|---------------------------------|-----------------|---------------|------------------|
| 1   | Glycerol                        | 0.74            | 0.025         | 1.69             |
| 2   | L-Threitol                      | 1.36            | 0.034         | 1.54             |
| 3   | L-Threonine                     | 0.79            | 0.007         | 2.22             |
| 4   | Docosahexaenoic acid (DHA)      | 0.55            | 0.010         | 2.12             |
| 5   | Conjugated linoleic acid (CLA)  | 0.76            | 0.020         | 1.76             |
| 6   | Eicosapentaenoic acid (EPA)     | 0.61            | 0.007         | 2.08             |
| 7   | Elaidic acid                    | 0.75            | 0.043         | 1.62             |
| 8   | 4-Deoxyerythronic acid          | 0.68            | 0.048         | 1.53             |
| 9   | 2-Ethylhydracrylic acid         | 1.48            | 0.016         | 1.86             |
| 10  | Lactic acid                     | 0.65            | 0.024         | 1.39             |
| 11  | Glycerol phosphate calcium salt | 0.71            | 0.020         | 1.83             |
| 12  | Oleamide                        | 1.94            | 0.006         | 1.54             |
| 13  | 4-Hydroxyproline                | 0.72            | 0.050         | 1.80             |
| 14  | Cholesterol                     | 0.57            | 0.040         | 1.71             |

<sup>a</sup>Fold change was obtained by calculating the relative concentration between administration of GS group compared with Control Group. <sup>b</sup>Variable importance in the projection (VIP) was obtained from PLS-DA with a threshold of 1.0.
